# Supplementary material
Source: Springer Nature journal article supplement (https://www.springermedizin.de/resource/supplementary/12891_2014_2422_MOESM1_ESM.pdf/9510220)

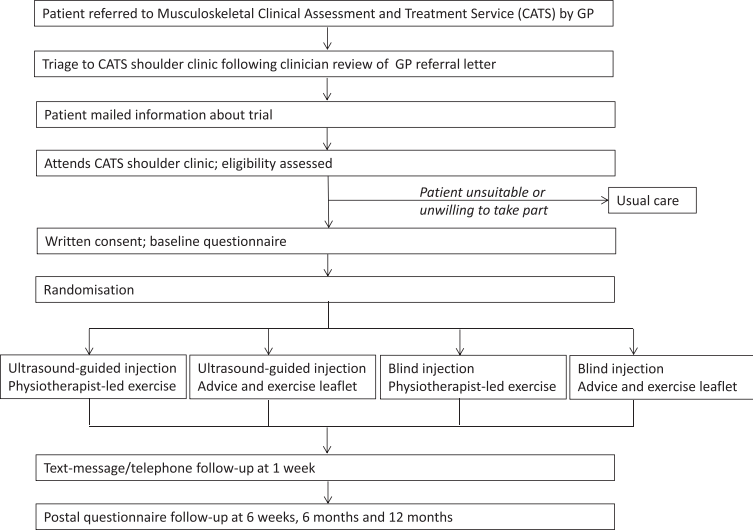

Supplement: MOESM1 [file 9510220]
